# Supplementary material for: Identification of loci genetically associated with antibodies to specific sets of citrullinated peptides in rheumatoid arthritis patients
Source: medRxiv preprint, doi:10.1101/2021.07.15.21259135, version 1 (2021-07-19)
Supplement: Supplementarty Spread Sheet 1 [file 259135_file09.pdf]

[illegible]
