# Supplementary material for: Identification of loci genetically associated with antibodies to specific sets of citrullinated peptides in rheumatoid arthritis patients
Source: bioRxiv or medRxiv preprint supplement (doi:10.1101/2021.07.15.21259135), 2021-07-19
Supplement: Supplementary file [file media-2.pdf]

**Table S1. Prevalence of individual auto-antibody specificities across RA patients in EIRA, NARAC and WTCCC cohorts using Phadia cip assay**

| Peptide name (Reed et al.) | Protein                | % positive EIRA | % positive NARAC | % positive WTCCC |
|----------------------------|------------------------|-----------------|------------------|------------------|
| Cit-Fib $\alpha_{563-583}$ | Fibrinogen alpha chain | 43.61           | 53.88            | 52.40            |
| Cit-Vim $_{60-75}$         | Vimentin               | 45.98           | 58.81            | 59.36            |
| cfc1-cyc (CCP1)            | Filaggrin              | 32.30           | 51.36            | 38.53            |
| Cit-Vim $_{2-17}$          | Vimentin               | 47.38           | 48.64            | 55.20            |
| CEP-1                      | alpha-enolase          | 41.48           | 50.16            | 46.37            |
| Cit-Fib $\alpha_{621-635}$ | Fibrinogen alpha chain | 25.08           | 45.39            | 32.25            |
| Cit-Fib $\alpha_{580-600}$ | Fibrinogen alpha chain | 47.75           | 55.61            | 70.83            |
| Cit-Fib $\beta_{36-52}$    | Fibrinogen beta chain  | 14.18           | 13.47            | 34.75            |
| Cit-Fib $\alpha_{96-50}$   | Fibrinogen alpha chain | 11.11           | 9.91             | 25.93            |
| Cit-Fib $\beta_{60-74}$    | Fibrinogen beta chain  | 4.59            | 2.46             | 15.39            |
| Cit-C1 $_{(Cit-R)}$        | type-II collagen       | 24.80           | 23.48            | 52.40            |
| Cit-C1 $_{(Cit-Cit)}$      | type-II collagen       | 27.91           | 27.62            | 48.38            |
| Cit-C1 $_{(R-Cit)}$        | type-II collagen       | 6.72            | 11.48            | 29.56            |
| Cit-F4 $_{(R-Cit)}$        | type-II collagen       | 34.59           | 28.25            | 51.47            |
| Cit-F4 $_{(Cit-Cit)}$      | type-II collagen       | 17.21           | 13.16            | 15.20            |
| Cit-F4 $_{(Cit-R)}$        | type-II collagen       | 58.36           | 64.57            | 28.14            |

**Table S2. Genomic regulatory elements perturbed by AB-associated SNPs (hg19)**

| SNP        | Location              | Allele | Feature         | Regulatory element |
|------------|-----------------------|--------|-----------------|--------------------|
| rs17013326 | 1:113546694-113546694 | A      | ENSR00000253653 | CTCF_binding_site  |
| rs61817589 | 1:113758713-113758713 | T      | ENSR00000011611 | promoter           |
| rs11552449 | 1:113905767-113905767 | G      | ENSR00000011633 | promoter           |
| rs11552449 | 1:113905767-113905767 | T      | ENSR00000011633 | promoter           |
| rs3811019  | 1:113928961-113928961 | G      | ENSR00000011636 | promoter           |
| rs12871509 | 13:42377939-42377939  | C      | ENSR00000061906 | TF_binding_site    |
| rs9594738  | 13:42378009-42378009  | T      | ENSR00000061906 | TF_binding_site    |
| rs56008941 | 13:42378475-42378475  | T      | ENSR00000061907 | TF_binding_site    |
| rs12870516 | 13:42381829-42381829  | C      | ENSR00000271772 | CTCF_binding_site  |
| rs2062305  | 13:42478744-42478744  | A      | ENSR00000271780 | CTCF_binding_site  |
| rs504850   | 19:55654109-55654109  | T      | ENSR00000111697 | promoter           |
| rs41382648 | 2:43305385-43305385   | T      | ENSR00000116158 | enhancer           |
| rs10196106 | 2:43344768-43344768   | T      | ENSR00000116170 | enhancer           |
| rs4450850  | 3:172171677-172171677 | C      | ENSR00000161921 | enhancer           |

Table S3 A. Aminoacid positions determining DRB1:01

| AA_DRB1_11_32660115_L | AA_DRB1_67_32659947_L | AA_DRB1_70_32659938_Q | AA_DRB1_71_32659935_R |
|-----------------------|-----------------------|-----------------------|-----------------------|
| AA                    | AP                    | AP                    | AA                    |
| AA                    | PP                    | PP                    | PA                    |
| PA                    | PP                    | PP                    | PA                    |
| PA                    | AP                    | AP                    | PA                    |
| PA                    | AP                    | AP                    | PP                    |
| AA                    | AP                    | AP                    | PA                    |
| PP                    | PP                    | PP                    | PP                    |
| AA                    | AA                    | AA                    | PA                    |
| AA                    | AP                    | PP                    | AA                    |
| AA                    | AA                    | AA                    | AA                    |
| AA                    | AP                    | PP                    | PA                    |
| PA                    | AP                    | PP                    | PA                    |
| AA                    | AA                    | AP                    | PA                    |
| AA                    | AA                    | AA                    | PP                    |
| AA                    | PP                    | PP                    | AA                    |
| AA                    | AA                    | AP                    | AA                    |
| AA                    | AA                    | PP                    | AA                    |
| AA                    | PP                    | AP                    | PA                    |
| AA                    | AP                    | AA                    | PP                    |
| AA                    | AP                    | AA                    | PP                    |
| PA                    | AA                    | AA                    | AA                    |
| PA                    | PP                    | PP                    | PP                    |
| PA                    | AA                    | AA                    | PA                    |
| AA                    | PP                    | AA                    | PP                    |
| PA                    | AP                    | AP                    | AA                    |
| PA                    | PP                    | AP                    | PP                    |
| PA                    | AP                    | AA                    | PA                    |
| AA                    | PP                    | AP                    | PP                    |
| AA                    | PP                    | PP                    | PP                    |
| PP                    | AP                    | AP                    | PA                    |
| PA                    | AA                    | AP                    | AA                    |
| PP                    | AA                    | AA                    | AA                    |
| PP                    | AP                    | PP                    | PA                    |

Table S3 B. Aminoacid positions determining DRB1:10

| AA_DRB1_9_32660121_E | AA_DRB1_10_32660118_E | AA_DRB1_11_32660115_V | AA_DRB1_30_32660058_R | AA_DRB1_31_32660055_V | AA_DRB1_32_32660052 |
|----------------------|-----------------------|-----------------------|-----------------------|-----------------------|---------------------|
| PP                   | AA                    | AA                    | AA                    | AA                    | HH                  |
| PP                   | AA                    | PP                    | AA                    | AA                    | YY                  |
| AP                   | AA                    | PA                    | AA                    | AA                    | YY                  |
| AP                   | AA                    | AA                    | AA                    | AA                    | HY                  |
| AA                   | AA                    | AA                    | AA                    | AA                    | YY                  |
| AP                   | PA                    | PA                    | PA                    | PA                    | HY                  |
| PP                   | AA                    | PA                    | AA                    | AA                    | YY                  |
| PP                   | AA                    | PA                    | AA                    | AA                    | HY                  |
| PP                   | AA                    | AA                    | AA                    | AA                    | HY                  |
| AP                   | AA                    | AA                    | AA                    | AA                    | YY                  |
| PP                   | PA                    | PA                    | PA                    | PA                    | HH                  |
| PP                   | AA                    | AA                    | AA                    | AA                    | YY                  |
| PP                   | PA                    | PP                    | PA                    | PA                    | HY                  |
| PP                   | PA                    | PA                    | PA                    | PA                    | HY                  |
| PP                   | PP                    | PP                    | PP                    | PP                    | HH                  |
| PP                   | AA                    | AA                    | PA                    | PA                    | HH                  |

Table S3 C. Aminoacid positions determining DRB1:04

| AA_DRB1_9_32660121_E | AA_DRB1_10_32660118_Q | AA_DRB1_11_32660115_V | AA_DRB1_26_32660070_F | AA_DRB1_28_32660064_D | AA_DRB1_31_32660055_F | AA_DRB1_33_32660049 |
|----------------------|-----------------------|-----------------------|-----------------------|-----------------------|-----------------------|---------------------|
| PP                   | AA                    | AA                    | AP                    | PP                    | PP                    | NN                  |
| PP                   | PP                    | PP                    | PP                    | PP                    | PP                    | HH                  |
| AP                   | PP                    | PA                    | AP                    | AP                    | AP                    | HN                  |
| AP                   | AP                    | AA                    | AP                    | AP                    | AP                    | NN                  |
| AA                   | PP                    | AA                    | AP                    | AA                    | AP                    | NN                  |
| AP                   | AP                    | PA                    | AP                    | AP                    | AP                    | NN                  |
| PP                   | AP                    | PA                    | PP                    | PP                    | PP                    | HN                  |
| AA                   | PP                    | AA                    | AA                    | AA                    | AA                    | NN                  |
| AP                   | AP                    | AA                    | PP                    | AP                    | PP                    | NN                  |
| PP                   | AP                    | PA                    | AP                    | AP                    | PP                    | HN                  |
| AA                   | PP                    | AA                    | AP                    | AP                    | AP                    | NN                  |
| AP                   | AP                    | AA                    | AP                    | PP                    | PP                    | NN                  |
| PP                   | AA                    | AA                    | PP                    | PP                    | PP                    | NN                  |
| PP                   | AP                    | PA                    | PP                    | PP                    | PP                    | HN                  |
| PP                   | AA                    | AA                    | AA                    | AA                    | PP                    | NN                  |
| PP                   | PP                    | AA                    | AA                    | PP                    | PP                    | NN                  |
| AP                   | AP                    | AA                    | AP                    | AP                    | PP                    | NN                  |
| AP                   | AP                    | PA                    | AP                    | AA                    | AP                    | NN                  |
| AP                   | AP                    | AA                    | PP                    | PP                    | PP                    | NN                  |
| AA                   | PP                    | AA                    | PP                    | PP                    | PP                    | NN                  |
| AP                   | AP                    | AA                    | PP                    | AA                    | PP                    | NN                  |
| AP                   | AP                    | PA                    | AP                    | AP                    | PP                    | NN                  |
| PP                   | AA                    | AA                    | AA                    | AA                    | AP                    | NN                  |
| PP                   | AA                    | AA                    | AA                    | AA                    | PP                    | NN                  |
| PP                   | AP                    | PP                    | AP                    | AP                    | AP                    | HN                  |
| PP                   | AA                    | PA                    | AA                    | AP                    | AP                    | NN                  |
| PP                   | AA                    | AA                    | AP                    | AA                    | PP                    | NN                  |
| AP                   | AP                    | AA                    | AP                    | AA                    | PP                    | NN                  |
| PP                   | AA                    | PP                    | AA                    | AA                    | AA                    | NN                  |
| PP                   | AA                    | AA                    | PP                    | AP                    | PP                    | NN                  |
| AP                   | AP                    | AA                    | AP                    | AA                    | AP                    | NN                  |
| PP                   | AA                    | AA                    | PP                    | AA                    | PP                    | NN                  |
| PP                   | AA                    | AA                    | PP                    | AA                    | AA                    | NN                  |
| AP                   | AP                    | AA                    | AP                    | AA                    | PP                    | NN                  |
| PP                   | AA                    | AA                    | PP                    | AA                    | PP                    | NN                  |
| PP                   | AP                    | AA                    | AP                    | AA                    | AP                    | NN                  |
| PP                   | AA                    | AA                    | AP                    | AA                    | PP                    | NN                  |
