# Supplementary material for: Identification of loci genetically associated with antibodies to specific sets of citrullinated peptides in rheumatoid arthritis patients
Source: bioRxiv or medRxiv preprint supplement (doi:10.1101/2021.07.15.21259135), 2021-07-19
Supplement: Supplementary file [file media-4.pdf]

| CHR | BP        | SNP        | A1 | A2 | N | P        | P.R.      | OR     | OR.R.  | Q      | i     | FDR         | PEPTIDE          |
|-----|-----------|------------|----|----|---|----------|-----------|--------|--------|--------|-------|-------------|------------------|
| 1   | 113877958 | rs11102648 | A  | C  | 3 | 1.51E-05 | 0.0004994 | 1.1918 | 1.19   | 0.2207 | 33.82 | 0.098660569 | cfcl1-cyc (CCP1) |
| 1   | 113926782 | rs1217203  | A  | C  | 2 | 1.48E-05 | 0.0001138 | 1.2413 | 1.2395 | 0.2663 | 19.09 | 0.098660569 | cfcl1-cyc (CCP1) |
| 1   | 113953370 | rs17031716 | A  | C  | 2 | 4.19E-06 | 0.001685  | 1.2112 | 1.2092 | 0.1233 | 52.22 | 0.066780098 | cfcl1-cyc (CCP1) |
| 1   | 113987113 | rs1230661  | A  | G  | 3 | 4.22E-06 | 0.0001062 | 1.2073 | 1.2062 | 0.2493 | 28.02 | 0.066780098 | cfcl1-cyc (CCP1) |
| 1   | 114035304 | rs4839335  | G  | A  | 3 | 1.13E-05 | 0.0001215 | 1.1925 | 1.1912 | 0.2765 | 22.21 | 0.081865109 | cfcl1-cyc (CCP1) |
| 1   | 114045700 | rs1230649  | C  | A  | 3 | 1.36E-05 | 0.0001919 | 1.1906 | 1.1891 | 0.2628 | 25.17 | 0.093049371 | cfcl1-cyc (CCP1) |
| 1   | 114047976 | rs1936398  | G  | A  | 3 | 1.37E-05 | 0.0002426 | 1.1905 | 1.189  | 0.252  | 27.45 | 0.093105447 | cfcl1-cyc (CCP1) |
| 1   | 114050905 | rs6669586  | G  | A  | 2 | 8.91E-06 | 7.34E-05  | 1.244  | 1.2423 | 0.2669 | 18.86 | 0.073315707 | cfcl1-cyc (CCP1) |
| 1   | 11405162  | rs1230647  | G  | A  | 3 | 1.29E-05 | 0.0003345 | 1.1912 | 1.1894 | 0.2353 | 30.89 | 0.0898954   | cfcl1-cyc (CCP1) |
| 1   | 114055415 | rs2295853  | A  | G  | 3 | 1.09E-05 | 0.0002679 | 1.193  | 1.1913 | 0.2398 | 29.98 | 0.081536019 | cfcl1-cyc (CCP1) |
| 1   | 114068870 | rs1230640  | A  | G  | 3 | 1.53E-05 | 0.0006829 | 1.1894 | 1.1871 | 0.2064 | 36.63 | 0.098747513 | cfcl1-cyc (CCP1) |
| 1   | 114069168 | rs1981319  | C  | A  | 3 | 1.30E-05 | 0.0002777 | 1.1911 | 1.1894 | 0.244  | 29.1  | 0.0898954   | cfcl1-cyc (CCP1) |
| 1   | 114076960 | rs12061482 | A  | G  | 3 | 1.23E-05 | 0.000189  | 1.1917 | 1.1904 | 0.2595 | 25.87 | 0.087125999 | cfcl1-cyc (CCP1) |
| 1   | 114078853 | rs12063216 | A  | G  | 3 | 1.09E-05 | 0.0002679 | 1.193  | 1.1913 | 0.2398 | 29.98 | 0.081536019 | cfcl1-cyc (CCP1) |
| 1   | 114089425 | rs10858017 | G  | A  | 3 | 1.54E-05 | 0.0001176 | 1.1891 | 1.1871 | 0.2109 | 35.75 | 0.0988401   | cfcl1-cyc (CCP1) |
| 1   | 114094067 | rs1230685  | G  | A  | 3 | 1.50E-05 | 0.0004948 | 1.1894 | 1.1876 | 0.2208 | 33.8  | 0.098660569 | cfcl1-cyc (CCP1) |
| 1   | 114101039 | rs2359167  | A  | G  | 3 | 1.49E-06 | 0.000141  | 1.2181 | 1.2167 | 0.208  | 36.31 | 0.066780098 | cfcl1-cyc (CCP1) |
| 1   | 114102858 | rs61817589 | A  | G  | 3 | 2.10E-06 | 0.0003349 | 1.2141 | 1.2125 | 0.1799 | 41.71 | 0.066780098 | cfcl1-cyc (CCP1) |
| 1   | 114104489 | rs2797412  | A  | G  | 3 | 1.02E-05 | 0.0002981 | 1.1936 | 1.1919 | 0.2328 | 31.4  | 0.078929018 | cfcl1-cyc (CCP1) |
| 1   | 114105331 | rs6679677  | A  | C  | 3 | 4.53E-07 | 4.53E-07  | 1.2842 | 1.2842 | 0.5692 | 0     | 0.049374952 | cfcl1-cyc (CCP1) |
| 1   | 114113291 | rs10858018 | A  | G  | 3 | 1.18E-05 | 0.0001864 | 1.1922 | 1.1907 | 0.259  | 25.98 | 0.084712455 | cfcl1-cyc (CCP1) |
| 1   | 114113958 | rs4145859  | G  | C  | 3 | 1.50E-06 | 0.0001104 | 1.2178 | 1.2164 | 0.2181 | 34.32 | 0.066780098 | cfcl1-cyc (CCP1) |
| 1   | 114117743 | rs12041547 | G  | C  | 3 | 2.23E-06 | 0.0002053 | 1.2137 | 1.2122 | 0.203  | 37.3  | 0.066780098 | cfcl1-cyc (CCP1) |
| 1   | 114139759 | rs1217396  | G  | A  | 3 | 1.51E-05 | 0.0002022 | 1.1896 | 1.1882 | 0.2635 | 25.01 | 0.098660569 | cfcl1-cyc (CCP1) |
| 1   | 114159273 | rs1217413  | G  | A  | 3 | 1.62E-06 | 0.0002386 | 1.2122 | 1.2109 | 0.2003 | 37.8  | 0.066780098 | cfcl1-cyc (CCP1) |
| 1   | 114167275 | rs1217389  | G  | A  | 3 | 1.51E-05 | 0.0002017 | 1.1896 | 1.1883 | 0.2637 | 24.98 | 0.098660569 | cfcl1-cyc (CCP1) |
| 1   | 114175958 | rs1217395  | G  | A  | 3 | 9.46E-06 | 0.0001234 | 1.1942 | 1.1932 | 0.2688 | 23.88 | 0.075682517 | cfcl1-cyc (CCP1) |
| 1   | 114178616 | rs1599971  | A  | G  | 3 | 1.57E-05 | 0.0002237 | 1.1892 | 1.1879 | 0.2601 | 25.73 | 0.09953135  | cfcl1-cyc (CCP1) |
| 1   | 114179091 | rs2476601  | A  | G  | 3 | 4.02E-07 | 4.02E-07  | 1.2856 | 1.2856 | 0.5881 | 0     | 0.049374952 | cfcl1-cyc (CCP1) |
| 1   | 114216891 | rs2488457  | G  | C  | 3 | 1.54E-06 | 0.0007875 | 1.208  | 1.2074 | 0.1615 | 45.15 | 0.066780098 | cfcl1-cyc (CCP1) |
| 1   | 114221851 | rs12566340 | A  | G  | 3 | 1.15E-05 | 0.0001874 | 1.1954 | 1.1946 | 0.2555 | 26.71 | 0.083354424 | cfcl1-cyc (CCP1) |
| 1   | 114221985 | rs7529353  | A  | G  | 3 | 9.66E-06 | 0.0001955 | 1.1971 | 1.1962 | 0.2481 | 28.26 | 0.076214959 | cfcl1-cyc (CCP1) |
| 1   | 114230984 | rs2358994  | A  | G  | 3 | 5.79E-06 | 5.79E-06  | 1.2213 | 1.2213 | 0.6524 | 0     | 0.070518994 | cfcl1-cyc (CCP1) |
| 1   | 114231038 | rs2358995  | C  | A  | 3 | 6.33E-06 | 6.33E-06  | 1.2202 | 1.2202 | 0.664  | 0     | 0.070518994 | cfcl1-cyc (CCP1) |
| 1   | 114249912 | rs11552449 | A  | G  | 3 | 3.92E-06 | 3.92E-06  | 1.2275 | 1.2275 | 0.5553 | 0     | 0.066780098 | cfcl1-cyc (CCP1) |
| 1   | 114251185 | rs3761936  | G  | A  | 3 | 4.05E-06 | 4.05E-06  | 1.2268 | 1.2268 | 0.5459 | 0     | 0.066780098 | cfcl1-cyc (CCP1) |
| 1   | 114251352 | rs11102701 | T  | A  | 3 | 2.29E-06 | 2.29E-06  | 1.2345 | 1.2345 | 0.5568 | 0     | 0.066780098 | cfcl1-cyc (CCP1) |
| 11  | 23421508  | rs7113623  | A  | G  | 2 | 1.22E-05 | 1.22E-05  | 1.3379 | 1.3379 | 0.8974 | 0     | 0.08675539  | cfcl1-cyc (CCP1) |
| 11  | 23421835  | rs4528328  | C  | A  | 2 | 1.22E-05 | 1.22E-05  | 1.3379 | 1.3379 | 0.8974 | 0     | 0.08675539  | cfcl1-cyc (CCP1) |
| 11  | 23422881  | rs1564102  | G  | A  | 3 | 4.96E-06 | 4.96E-06  | 1.2747 | 1.2747 | 0.4676 | 0     | 0.066780098 | cfcl1-cyc (CCP1) |
| 11  | 23423031  | rs1564100  | G  | A  | 3 | 8.47E-06 | 8.47E-06  | 1.2673 | 1.2673 | 0.4793 | 0     | 0.071444742 | cfcl1-cyc (CCP1) |
| 11  | 23426531  | rs2126507  | G  | A  | 3 | 5.20E-06 | 5.20E-06  | 1.2742 | 1.2742 | 0.4717 | 0     | 0.066780098 | cfcl1-cyc (CCP1) |
| 1   | 113926782 | rs1217203  | A  | G  | 2 | 3.47E-06 | 3.47E-06  | 1.2609 | 1.2609 | 0.6878 | 0     | 0.066780098 | CEP-1            |
| 1   | 113962281 | rs11102661 | A  | G  | 3 | 6.79E-06 | 0.0003546 | 1.2051 | 1.1996 | 0.1063 | 55.38 | 0.070518994 | CEP-1            |
| 1   | 113962639 | rs1217200  | C  | A  | 3 | 7.79E-06 | 0.00057   | 1.2033 | 1.1975 | 0.0847 | 59.49 | 0.070518994 | CEP-1            |
| 1   | 113964142 | rs1217193  | C  | G  | 3 | 7.62E-06 | 0.006655  | 1.2037 | 1.1974 | 0.079  | 60.61 | 0.070518994 | CEP-1            |
| 1   | 113966031 | rs12565589 | A  | G  | 3 | 8.82E-06 | 0.006522  | 1.202  | 1.1961 | 0.0823 | 59.96 | 0.073315707 | CEP-1            |
| 1   | 113972360 | rs1777234  | A  | T  | 3 | 7.67E-06 | 0.006708  | 1.2036 | 1.1974 | 0.0786 | 60.68 | 0.070518994 | CEP-1            |
| 1   | 113987113 | rs1230661  | A  | G  | 3 | 4.97E-06 | 0.02649   | 1.2126 | 1.2032 | 0.0214 | 73.99 | 0.066780098 | CEP-1            |
| 1   | 113988894 | rs1777237  | G  | A  | 3 | 9.38E-06 | 0.005715  | 1.2013 | 1.1956 | 0.0897 | 58.53 | 0.075581721 | CEP-1            |
| 1   | 113992696 | rs1777238  | G  | A  | 3 | 9.38E-06 | 0.005715  | 1.2013 | 1.1956 | 0.0897 | 58.53 | 0.075581721 | CEP-1            |
| 1   | 113998406 | rs1146182  | C  | A  | 3 | 9.20E-06 | 0.005745  | 1.2015 | 1.1959 | 0.089  | 58.67 | 0.074908787 | CEP-1            |
| 1   | 114008837 | rs1743605  | A  | G  | 3 | 8.35E-06 | 0.004853  | 1.2025 | 1.1969 | 0.0954 | 57.44 | 0.071444742 | CEP-1            |
| 1   | 114014094 | rs1146187  | A  | G  | 3 | 8.62E-06 | 0.005816  | 1.2023 | 1.1965 | 0.0872 | 59.02 | 0.072538889 | CEP-1            |
| 1   | 114019784 | rs1230659  | A  | G  | 3 | 7.20E-06 | 0.003556  | 1.2042 | 1.1991 | 0.1068 | 55.29 | 0.070518994 | CEP-1            |
| 1   | 114019974 | rs1230658  | C  | G  | 3 | 7.81E-06 | 0.003495  | 1.2033 | 1.1984 | 0.1092 | 54.84 | 0.070518994 | CEP-1            |
| 1   | 114035394 | rs4839335  | G  | A  | 3 | 6.53E-06 | 0.003656  | 1.2051 | 1.1994 | 0.1044 | 55.75 | 0.070518994 | CEP-1            |
| 1   | 114045700 | rs1230649  | C  | A  | 3 | 5.70E-06 | 0.003479  | 1.2066 | 1.201  | 0.1036 | 55.89 | 0.070327765 | CEP-1            |
| 1   | 114047976 | rs1936398  | G  | A  | 3 | 5.25E-06 | 0.003558  | 1.2074 | 1.2017 | 0.101  | 56.37 | 0.066780098 | CEP-1            |
| 1   | 114050905 | rs6669586  | G  | A  | 2 | 3.76E-07 | 3.76E-07  | 1.2841 | 1.2841 | 0.9438 | 0     | 0.049374952 | CEP-1            |
| 1   | 11405162  | rs1230647  | G  | A  | 3 | 4.89E-06 | 0.004946  | 1.2083 | 1.2022 | 0.0842 | 59.59 | 0.066780098 | CEP-1            |
| 1   | 114055415 | rs2295853  | A  | G  | 3 | 4.99E-06 | 0.004922  | 1.208  | 1.2019 | 0.0848 | 59.46 | 0.066780098 | CEP-1            |
| 1   | 114068870 | rs1230640  | G  | A  | 3 | 4.91E-06 | 0.00444   | 1.2082 | 1.202  | 0.0897 | 58.53 | 0.066780098 | CEP-1            |
| 1   | 114069168 | rs1981319  | C  | A  | 3 | 5.95E-06 | 0.004791  | 1.2061 | 1.2002 | 0.0895 | 58.56 | 0.070518994 | CEP-1            |
| 1   | 114076960 | rs12061482 | A  | G  | 3 | 7.07E-06 | 0.003982  | 1.2083 | 1.2023 | 0.0955 | 57.43 | 0.066780098 | CEP-1            |
| 1   | 114078853 | rs12063216 | A  | G  | 3 | 6.02E-06 | 0.004827  | 1.206  | 1.1999 | 0.0896 | 58.54 | 0.070518994 | CEP-1            |
| 1   | 114089425 | rs10858017 | G  | A  | 3 | 5.23E-06 | 0.004303  | 1.2073 | 1.2013 | 0.092  | 58.09 | 0.066780098 | CEP-1            |
| 1   | 114094067 | rs1230685  | G  | A  | 3 | 4.87E-06 | 0.004678  | 1.2081 | 1.2019 | 0.087  | 59.05 | 0.066780098 | CEP-1            |
| 1   | 114101039 | rs2359167  | A  | G  | 3 | 2.55E-06 | 0.02188   | 1.2201 | 1.2099 | 0.0222 | 73.73 | 0.066780098 | CEP-1            |
| 1   | 114102858 | rs61817589 | A  | G  | 3 | 2.74E-06 | 0.02428   | 1.2187 | 1.2087 | 0.0197 | 74.55 | 0.066780098 | CEP-1            |
| 1   | 114104489 | rs2797412  | A  | G  | 3 | 6.72E-06 | 0.004719  | 1.2049 | 1.199  | 0.0927 | 57.96 | 0.070518994 | CEP-1            |
| 1   | 114105331 | rs6679677  | A  | C  | 3 | 7.87E-09 | 9.00E-09  | 1.3469 | 1.3468 | 0.3653 | 0.7   | 0.002963304 | CEP-1            |
| 1   | 114113291 | rs10858018 | A  | G  | 3 | 5.29E-06 | 0.003743  | 1.2074 | 1.2018 | 0.0986 | 56.84 | 0.066780098 | CEP-1            |
| 1   | 114113958 | rs4145859  | G  | C  | 3 | 2.91E-06 | 0.02121   | 1.2184 | 1.2086 |        |       |             |                  |

|    |           |            |   |   |          |          |           |          |        |        |             |               |                 |       |
|----|-----------|------------|---|---|----------|----------|-----------|----------|--------|--------|-------------|---------------|-----------------|-------|
| 13 | 41892481  | r9590697   | G | A | C        | 3        | 6.80E-06  | 6.80E-06 | 1.2289 | 1.2289 | 0.6745      | 0             | 0.070518994     | CEP-1 |
| 13 | 41893262  | r727243    | A | G | 3        | 4.13E-06 | 4.13E-06  | 1.2336   | 1.2336 | 0.6772 | 0           | 0.066780098   | CEP-1           |       |
| 13 | 41895324  | r912425    | G | A | 3        | 2.20E-06 | 2.20E-06  | 1.2376   | 1.2376 | 0.8985 | 0           | 0.066780098   | CEP-1           |       |
| 13 | 41903533  | r4942120   | G | A | 3        | 3.98E-06 | 3.98E-06  | 1.2265   | 1.2265 | 0.931  | 0           | 0.066780098   | CEP-1           |       |
| 13 | 41905194  | r2324873   | G | A | 3        | 3.30E-06 | 3.30E-06  | 1.2311   | 1.2311 | 0.8532 | 0           | 0.066780098   | CEP-1           |       |
| 13 | 41906177  | r51924128  | G | A | 3        | 2.80E-06 | 2.80E-06  | 1.2306   | 1.2306 | 0.9219 | 0           | 0.066780098   | CEP-1           |       |
| 13 | 41906994  | r19241416  | G | A | 3        | 4.21E-06 | 4.21E-06  | 1.2288   | 1.2288 | 0.9123 | 0           | 0.066780098   | CEP-1           |       |
| 13 | 41907008  | r1924415   | C | G | 3        | 2.04E-06 | 2.04E-06  | 1.2416   | 1.2416 | 0.8286 | 0           | 0.066780098   | CEP-1           |       |
| 13 | 41907566  | r1575525   | G | C | 3        | 4.38E-06 | 4.38E-06  | 1.2285   | 1.2285 | 0.9364 | 0           | 0.066780098   | CEP-1           |       |
| 13 | 41909160  | r9525624   | A | C | 3        | 1.02E-06 | 1.02E-06  | 1.2452   | 1.2452 | 0.9257 | 0           | 0.066780098   | CEP-1           |       |
| 13 | 41910590  | r4942121   | A | G | 3        | 1.25E-06 | 1.25E-06  | 1.2462   | 1.2462 | 0.9102 | 0           | 0.066780098   | CEP-1           |       |
| 13 | 41912464  | r12864265  | A | G | 3        | 2.25E-06 | 2.25E-06  | 1.2405   | 1.2405 | 0.8968 | 0           | 0.066780098   | CEP-1           |       |
| 13 | 41914294  | r17535911  | C | A | 3        | 2.35E-06 | 2.35E-06  | 1.2399   | 1.2399 | 0.9099 | 0           | 0.066780098   | CEP-1           |       |
| 13 | 41915369  | r6561045   | G | A | 3        | 1.47E-06 | 1.47E-06  | 1.2443   | 1.2443 | 0.8977 | 0           | 0.066780098   | CEP-1           |       |
| 13 | 41915470  | r7316953   | A | G | 3        | 1.67E-06 | 1.67E-06  | 1.2429   | 1.2429 | 0.9117 | 0           | 0.066780098   | CEP-1           |       |
| 13 | 41915500  | r1324005   | C | G | 3        | 2.38E-06 | 2.38E-06  | 1.2398   | 1.2398 | 0.8899 | 0           | 0.066780098   | CEP-1           |       |
| 13 | 41915895  | r9531104   | C | G | 3        | 2.56E-06 | 2.56E-06  | 1.1939   | 1.1939 | 0.4092 | 0           | 0.066780098   | CEP-1           |       |
| 13 | 41916030  | r9525625   | A | C | 3        | 2.20E-06 | 2.20E-06  | 1.1954   | 1.1954 | 0.4039 | 0           | 0.066780098   | CEP-1           |       |
| 13 | 41916177  | r720824    | A | T | 3        | 2.05E-06 | 2.05E-06  | 1.2416   | 1.2416 | 0.8944 | 0           | 0.066780098   | CEP-1           |       |
| 13 | 41916898  | r4942122   | G | A | 3        | 2.57E-06 | 2.57E-06  | 1.2389   | 1.2389 | 0.901  | 0           | 0.066780098   | CEP-1           |       |
| 13 | 41917046  | r4942123   | G | A | 3        | 2.05E-06 | 2.05E-06  | 1.2416   | 1.2416 | 0.8944 | 0           | 0.066780098   | CEP-1           |       |
| 13 | 41932968  | r1853573   | G | C | 3        | 1.03E-06 | 1.33E-05  | 1.2029   | 1.2028 | 0.2858 | 20.15       | 0.066780098   | CEP-1           |       |
| 13 | 41933209  | r17536002  | G | A | 3        | 2.27E-06 | 2.27E-06  | 1.2404   | 1.2404 | 0.889  | 0           | 0.066780098   | CEP-1           |       |
| 13 | 41938043  | r9594766   | G | A | 3        | 2.06E-06 | 2.07E-06  | 1.196    | 1.196  | 0.3678 | 0.02        | 0.066780098   | CEP-1           |       |
| 13 | 41944036  | r2095816   | G | A | 3        | 3.63E-06 | 1.65E-05  | 1.1912   | 1.1911 | 0.3162 | 13.16       | 0.066780098   | CEP-1           |       |
| 13 | 41944054  | r9527623   | A | G | 3        | 2.62E-06 | 2.62E-06  | 1.2388   | 1.2388 | 0.8961 | 0           | 0.066780098   | CEP-1           |       |
| 13 | 41944812  | r9533117   | A | T | 3        | 3.22E-06 | 3.22E-06  | 1.233    | 1.233  | 0.8534 | 0           | 0.066780098   | CEP-1           |       |
| 13 | 41945920  | r9315920   | G | A | 3        | 3.72E-06 | 3.72E-06  | 1.2301   | 1.2301 | 0.9555 | 0           | 0.066780098   | CEP-1           |       |
| 13 | 41947482  | r9594768   | C | A | 2        | 1.99E-06 | 1.99E-06  | 1.2439   | 1.2439 | 0.7297 | 0           | 0.066780098   | CEP-1           |       |
| 13 | 41949804  | r912423    | T | A | 3        | 3.99E-06 | 3.99E-06  | 1.2293   | 1.2293 | 0.9604 | 0           | 0.066780098   | CEP-1           |       |
| 13 | 41950880  | r2062305   | G | A | 3        | 2.10E-06 | 2.10E-06  | 1.196    | 1.196  | 0.3679 | 0           | 0.066780098   | CEP-1           |       |
| 13 | 41955549  | r1351832   | A | G | 3        | 3.03E-06 | 3.03E-06  | 1.2297   | 1.2297 | 0.9569 | 0           | 0.066780098   | CEP-1           |       |
| 13 | 41958407  | r17536071  | A | G | 3        | 1.88E-06 | 1.88E-06  | 1.2417   | 1.2417 | 0.8671 | 0           | 0.066780098   | CEP-1           |       |
| 13 | 41959963  | r12871228  | A | G | 3        | 8.17E-06 | 8.17E-06  | 1.222    | 1.222  | 0.9512 | 0           | 0.07180056    | CEP-1           |       |
| 13 | 41962910  | r12868231  | A | G | 3        | 8.89E-06 | 8.89E-06  | 1.2211   | 1.2211 | 0.9299 | 0           | 0.07315707    | CEP-1           |       |
| 13 | 7927550   | r434948    | C | A | 2        | 2.49E-06 | 2.49E-06  | 0.8143   | 0.3945 | 0      | 0           | 0.066780098   | CEP-1           |       |
| 1  | 113987113 | r1230661   | A | G | 3        | 1.06E-05 | 0.0001392 | 1.1973   | 1.1959 | 0.2686 | 23.93       | 0.080236034   | Cit-FibP36-52   |       |
| 1  | 114101039 | r2359167   | A | G | 3        | 6.45E-06 | 0.0001632 | 1.2027   | 1.2008 | 0.2462 | 28.65       | 0.070518994   | Cit-FibP36-52   |       |
| 1  | 114102858 | r61817589  | A | G | 3        | 1.12E-05 | 0.0004737 | 1.1964   | 1.1942 | 0.2144 | 35.05       | 0.081865109   | Cit-FibP36-52   |       |
| 1  | 114105331 | r6679677   | A | C | 3        | 1.82E-07 | 5.45E-05  | 1.2947   | 1.291  | 0.1975 | 38.35       | 0.034249906   | Cit-FibP36-52   |       |
| 1  | 114113958 | r4145859   | G | C | 3        | 7.22E-06 | 0.0001326 | 1.2013   | 1.1996 | 0.2586 | 26.06       | 0.070518994   | Cit-FibP36-52   |       |
| 1  | 114117743 | r12041547  | G | C | 3        | 1.06E-05 | 0.0002743 | 1.1972   | 1.1953 | 0.2386 | 30.22       | 0.080236034   | Cit-FibP36-52   |       |
| 1  | 114159273 | r1217413   | G | A | 3        | 9.62E-06 | 0.0001653 | 1.1983   | 1.1967 | 0.258  | 26.19       | 0.076214959   | Cit-FibP36-52   |       |
| 1  | 114179091 | r2476601   | A | G | 3        | 1.26E-07 | 1.70E-05  | 1.2991   | 1.296  | 0.2294 | 32.08       | 0.02749168    | Cit-FibP36-52   |       |
| 1  | 114216891 | r2488457   | G | C | 3        | 3.20E-06 | 0.000061  | 1.2124   | 1.2105 | 0.1888 | 40.01       | 0.066780098   | Cit-FibP36-52   |       |
| 1  | 114221985 | r7529353   | A | G | 3        | 1.53E-05 | 0.0007566 | 1.1918   | 1.1897 | 0.2002 | 37.82       | 0.098747513   | Cit-FibP36-52   |       |
| 1  | 114105331 | r6679677   | A | C | 3        | 2.98E-06 | 0.0001008 | 1.259    | 1.2557 | 0.2461 | 28.68       | 0.066780098   | Cit-FibL563-583 |       |
| 1  | 114179091 | r2476601   | A | G | 3        | 2.66E-06 | 7.53E-05  | 1.2604   | 1.2573 | 0.2544 | 26.95       | 0.066780098   | Cit-FibL563-583 |       |
| 1  | 114105331 | r6679677   | A | C | 3        | 1.37E-06 | 0.00246   | 1.2861   | 1.2872 | 0.0776 | 60.88       | 0.066780098   | Cit-FibL580-600 |       |
| 1  | 114179091 | r2476601   | A | G | 3        | 1.49E-06 | 0.002827  | 1.2849   | 1.286  | 0.0735 | 61.69       | 0.066780098   | Cit-FibL580-600 |       |
| 1  | 114230984 | r2358994   | A | G | 3        | 7.40E-07 | 2.41E-05  | 1.2581   | 1.2582 | 0.2527 | 27.31       | 0.063590404   | Cit-FibL580-600 |       |
| 1  | 114231038 | r2358995   | A | G | 3        | 8.02E-07 | 2.13E-05  | 1.2571   | 1.2573 | 0.2594 | 25.88       | 0.063590404   | Cit-FibL580-600 |       |
| 1  | 114249912 | r11552449  | A | G | 3        | 9.47E-07 | 8.93E-05  | 1.2573   | 1.2575 | 0.2086 | 36.19       | 0.066780098   | Cit-FibL580-600 |       |
| 1  | 114251185 | r3761936   | G | A | 3        | 6.93E-07 | 0.0001061 | 1.2606   | 1.2608 | 0.1939 | 39.05       | 0.063590404   | Cit-FibL580-600 |       |
| 1  | 114251352 | r11102701  | T | A | 3        | 4.59E-07 | 0.0001287 | 1.2666   | 1.267  | 0.1756 | 42.51       | 0.049374952   | Cit-FibL580-600 |       |
| 11 | 6244494   | r11040832  | A | G | 3        | 1.53E-05 | 0.0001424 | 1.2935   | 1.2912 | 0.5472 | 22.72       | 0.098747513   | Cit-FibL580-600 |       |
| 11 | 70886820  | r11797895A | G | 2 | 1.05E-06 | 1.05E-06 | 1.628     | 1.628    | 0.4192 | 0      | 0.066780098 | Cit-FibL36-50 |                 |       |
| 17 | 12107064  | r12452363  | A | G | 3        | 3.85E-06 | 3.85E-06  | 1.2608   | 1.2608 | 0.4358 | 0           | 0.066780098   | Cit-FibL36-50   |       |
| 1  | 114105331 | r6679677   | A | C | 3        | 7.37E-08 | 7.37E-08  | 1.3145   | 1.3145 | 0.7345 | 0           | 0.018495075   | Cit-FibL621-635 |       |
| 1  | 114179091 | r2476601   | A | G | 3        | 4.93E-08 | 4.93E-08  | 1.3193   | 1.3193 | 0.7282 | 0           | 0.014843258   | Cit-FibL621-635 |       |
| 1  | 114216891 | r2488457   | G | C | 3        | 1.04E-05 | 1.04E-05  | 1.2078   | 1.2078 | 0.9877 | 0           | 0.079619666   | Cit-FibL621-635 |       |
| 1  | 114230984 | r2358994   | A | G | 3        | 5.94E-06 | 5.94E-06  | 1.229    | 1.229  | 0.3732 | 0           | 0.070518994   | Cit-FibL621-635 |       |
| 1  | 114231038 | r2358995   | C | A | 3        | 6.48E-06 | 6.48E-06  | 1.228    | 1.228  | 0.3812 | 0           | 0.070518994   | Cit-FibL621-635 |       |
| 1  | 114251185 | r3761936   | G | A | 3        | 1.32E-05 | 0.0001577 | 1.2211   | 1.2182 | 0.2753 | 22.47       | 0.090447862   | Cit-FibL621-635 |       |
| 1  | 114251352 | r11102701  | T | A | 3        | 7.09E-06 | 6.67E-06  | 1.2296   | 1.2287 | 0.3367 | 8.14        | 0.070518994   | Cit-FibL621-635 |       |
| 1  | 43386028  | r1332648   | A | G | 3        | 7.58E-06 | 0.0001424 | 1.2935   | 1.2912 | 0.2561 | 26.58       | 0.070518994   | Cit-FibL621-635 |       |
| 2  | 4319650   | r4372955   | G | A | 3        | 8.48E-06 | 0.0004946 | 1.2898   | 1.2869 | 0.2021 | 37.46       | 0.071744742   | Cit-FibL621-635 |       |
| 1  | 114101039 | r2359167   | A | G | 3        | 8.12E-06 | 8.12E-06  | 1.2126   | 1.2126 | 0.6045 | 0           | 0.07180056    | Cit-FibP60-74   |       |
| 1  | 114102858 | r61817589  | A | G | 3        | 1.29E-05 | 1.29E-05  | 1.2069   | 1.2069 | 0.5855 | 0           | 0.0898954     | Cit-FibP60-74   |       |
| 1  | 114105331 | r6679677   | A | C | 3        | 7.83E-07 | 3.21E-06  | 1.2968   | 1.2964 | 0.3272 | 10.49       | 0.063590404   | Cit-FibP60-74   |       |
| 1  | 114113958 | r4145859   | G | C | 3        | 7.87E-06 | 7.87E-06  | 1.2128   | 1.2128 | 0.6029 | 0           | 0.070518994   | Cit-FibP60-74   |       |
| 1  | 114117743 | r12041547  | G | C | 3        | 7.62E-06 | 7.62E-06  | 1.2131   | 1.2131 | 0.5707 | 0           | 0.070518994   | Cit-FibP60-74   |       |
| 1  | 114159273 | r1217413   | G | A | 3        | 9.12E-06 | 9.12E-06  | 1.2112   | 1.2112 | 0.6198 | 0           | 0.074628233   | Cit-FibP60-74   |       |
| 1  | 114179091 | r2476601   | A | G | 3        | 4.94E-07 | 4.94E-07  | 1.3026   | 1.3026 | 0.392  | 0           | 0.049648241   | Cit-FibP60-74   |       |
| 1  | 114216891 | r2488457   | G | C | 3        | 6.67E-06 | 6.67E-06  | 1.2177   | 1.2177 | 0.4884 | 0           | 0.070518994   | Cit-FibP60-74   |       |
| 17 | 13383091  | r22901565  | G | C | 3        | 6.77E-06 | 6.77E-06  | 0.805    | 0.805  | 0.5987 | 0           | 0.070518994   | Cit-FibP60-74   |       |
| 2  | 181864898 | r61358146  | A | G | 2        | 1.41E-05 | 1.41E-05  | 0.7916   | 0.7916 | 0.9038 | 0           | 0.095445172   | Cit-C1(Cit-R)   |       |
| 2  | 181865035 | r6728366   | A | G | 2        | 1.49E-05 | 1.49E-05  | 0.792    | 0.792  | 0.8914 | 0           | 0.098660569   | Cit-C1(Cit-R)   |       |
| 2  | 181869724 | r1899036   | A | T | 2        | 1.29E-05 | 1.29E-05  | 0.7904   | 0.7904 | 0.7159 | 0           | 0.0898954     | Cit-C1(Cit-R)   |       |
| 5  | 72509655  | r6893265   | G | A | 3        | 5.14E-06 | 5.14E-06  | 0.7288   | 0.7288 | 0.5526 | 0           | 0.066780098   | Cit-C1(Cit-R)   |       |
| 5  | 72514645  | r73762301  | G | A | 3        | 6.79E-06 | 6.79E-06  | 0.7321   | 0.7321 | 0.5384 | 0           | 0.070518994   | Cit-C1(Cit-R)   |       |
| 5  | 72515584  | r73762302  | G | C | 3        | 7.32E-06 | 7.32E-06  | 0.7329   | 0.7329 | 0.5388 | 0           | 0.070518994   | Cit-C1(Cit-R)   |       |
| 5  | 72517327  | r55635013  | C | A | 3        | 5.51E-06 | 5.51E-06  | 0.7296   | 0.7296 | 0.5619 | 0           | 0.068593899   | Cit-C1(Cit-R)   |       |
| 5  | 72521285  | r61341658  | C | G | 3        | 7.84E-06 | 7.84E-06  | 0.7337   | 0.7337 | 0.5638 | 0           | 0.070518994   | C               |       |
